# Supplementary material
Source: Springer Nature journal article supplement (https://www.springermedizin.de/resource/supplementary/13054_2011_552_MOESM5_ESM.pdf/9708758)

| Study                           | Restrictive |       |            | Routine |       |            | Weight        | Mean Difference<br>[95% CI] |
|---------------------------------|-------------|-------|------------|---------|-------|------------|---------------|-----------------------------|
|                                 | Mean        | SD    | Total      | Mean    | SD    | Total      |               |                             |
| <b>Primary analysis: trials</b> |             |       |            |         |       |            |               |                             |
| Krivopal et al, 2003            | 9.55        | 7.19  | 51         | 11.93   | 9.91  | 43         | 18.2%         | -2.38 [-5.94, 1.18]         |
| Clec'h et al, 2008              | 23.4        | 15.8  | 81         | 22.3    | 15.6  | 84         | 10.1%         | 1.10 [-3.69, 5.89]          |
| Hejblum et al, 2009             | 13.21       | 11.01 | 306        | 13.96   | 11.61 | 305        | 71.7%         | -0.75 [-2.54, 1.04]         |
| <b>Patients</b>                 |             |       | <b>438</b> |         |       | <b>432</b> | <b>100.0%</b> | <b>-0.86 [-2.38, 0.66]</b>  |

Overall effect:  $p=0.27$ ; heterogeneity:  $I^2=0\%$

#### Sensitivity analysis: trials and observational studies

|                      |       |       |             |       |       |             |               |                           |
|----------------------|-------|-------|-------------|-------|-------|-------------|---------------|---------------------------|
| Price et al, 1999    | 5.8   | 1.7   | 1588        | 5.6   | 1.2   | 1839        | 42.1%         | 0.20 [0.10, 0.30]         |
| Leong et al, 2000    | 2.7   | 4.4   | 100         | 4.1   | 4.7   | 100         | 4.0%          | -1.4 [-2.66, -0.14]       |
| Krinsley et al, 2003 | 3.57  | 5.27  | 1267        | 3.55  | 5.14  | 1297        | 21.8%         | 0.02 [-0.38, 0.42]        |
| Krivopal et al, 2003 | 9.55  | 7.19  | 51          | 11.93 | 9.91  | 43          | 0.5%          | -2.38 [-5.94, 1.18]       |
| Graat et al, 2007    | 1.9   | 2.74  | 622         | 1.9   | 2.67  | 754         | 29.2%         | 0.00 [-0.29, 0.29]        |
| Clec'h et al, 2008   | 23.4  | 15.8  | 81          | 22.3  | 15.6  | 84          | 0.3%          | 1.10 [-3.69, 5.89]        |
| Hejblum et al, 2009  | 13.21 | 11.01 | 306         | 13.96 | 11.61 | 305         | 2.0%          | -0.75 [-2.54, 1.04]       |
| <b>Patients</b>      |       |       | <b>4015</b> |       |       | <b>4422</b> | <b>100.0%</b> | <b>0.01 [-0.25, 0.27]</b> |

Overall effect:  $p=0.95$ ; heterogeneity:  $I^2=47\%$

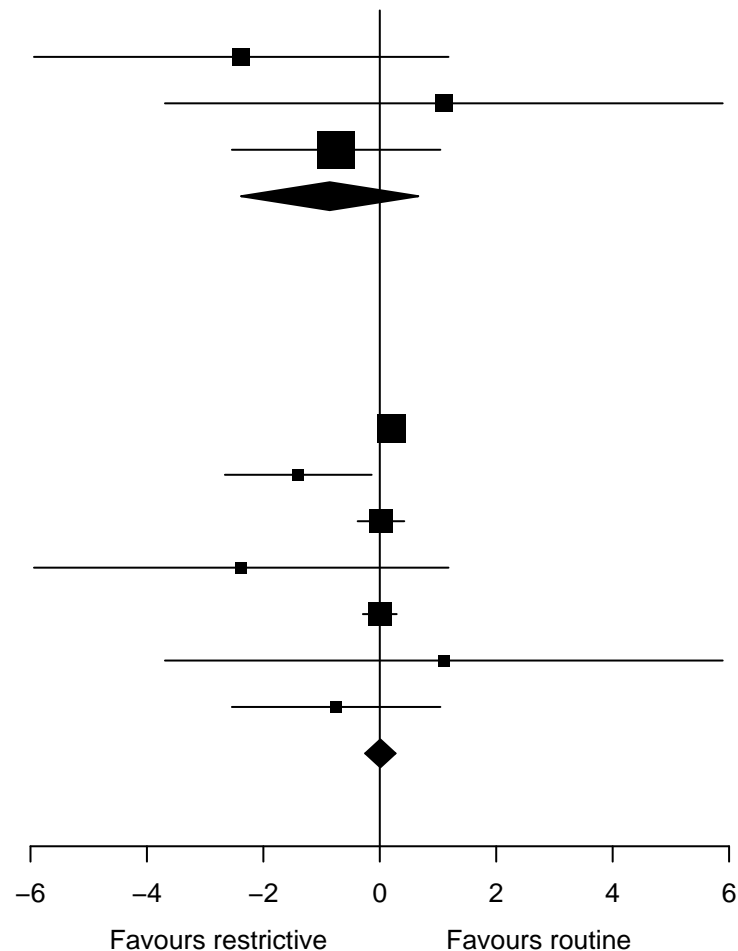

Supplement: MOESM5 [file 9708758]
